# Supplementary material
Source: PubMed Central journal article supplement (PMC6496105)
Supplement: AAC.00054-19-s0001.pdf [file AAC.00054-19-s0001.pdf]

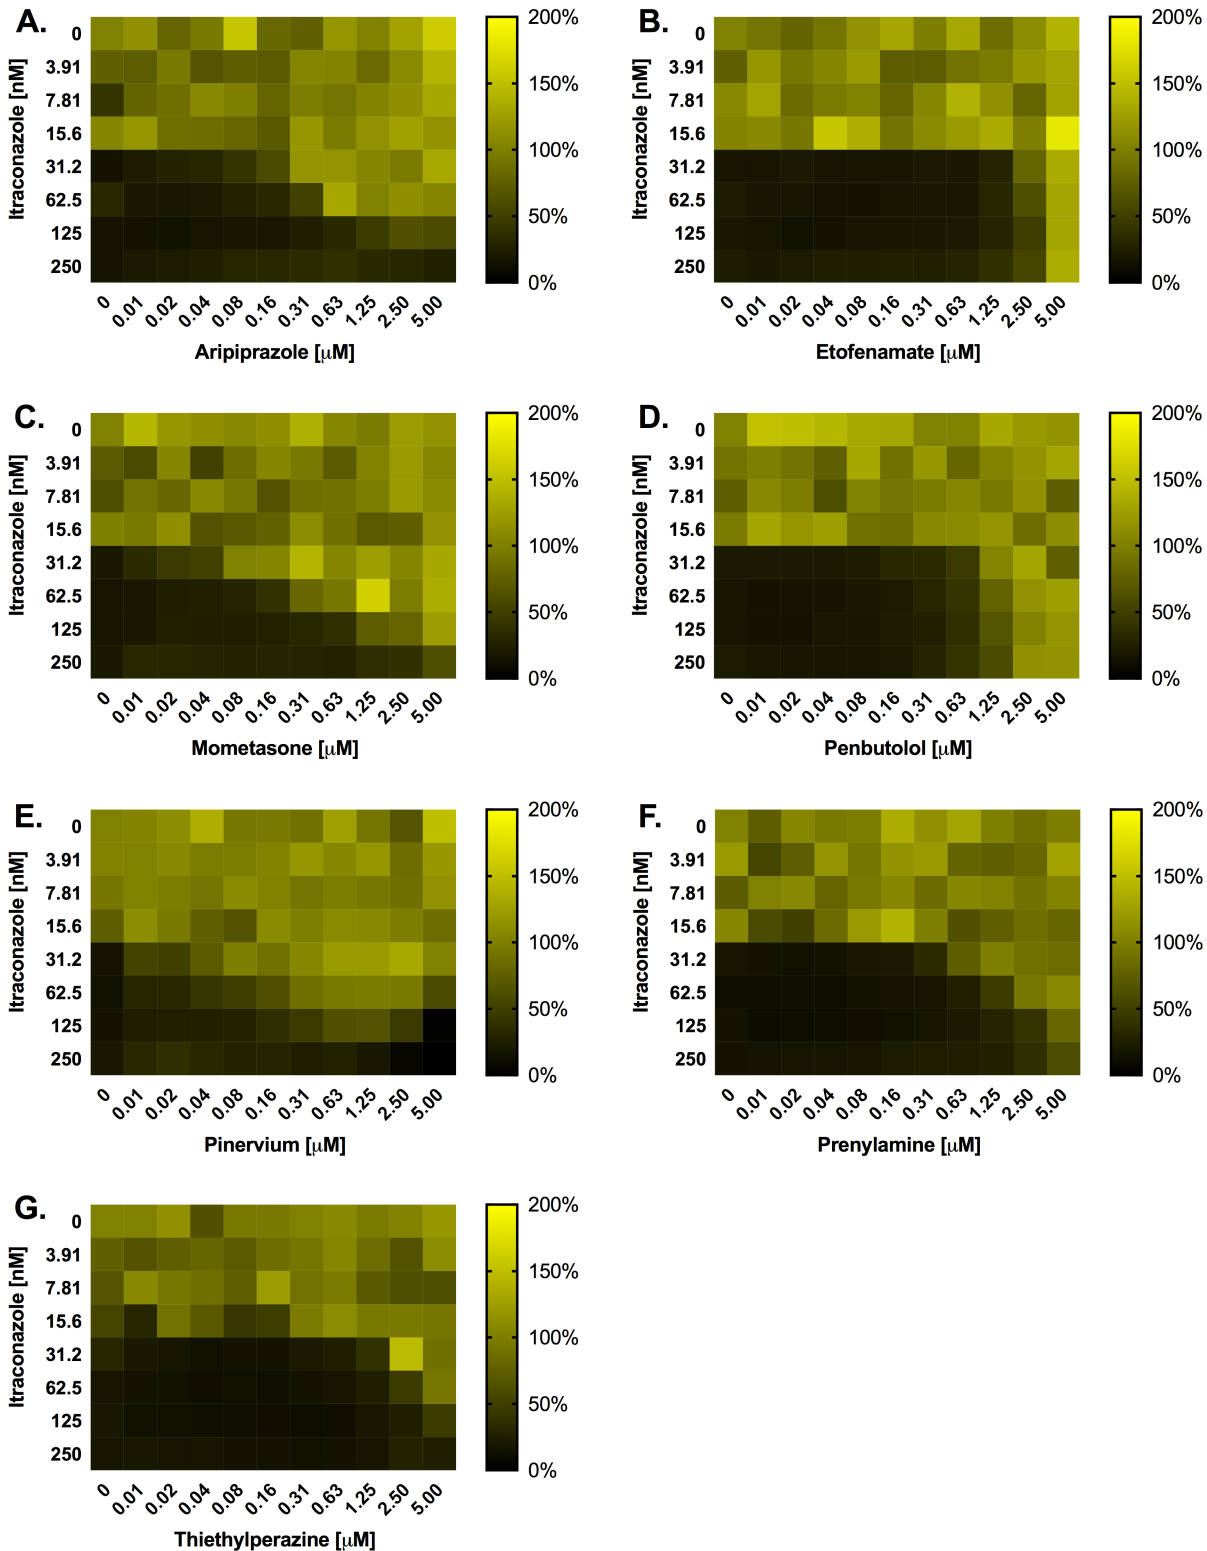

**Supplemental Figure 1. A variety of approved medications substantially diminish *Candida albicans* susceptibility to itraconazole.** *C. albicans* (strain SC5314) susceptibility to itraconazole was tested in the absence (DMSO vehicle alone) or presence of 5  $\mu$ M of the indicated compounds, in RPMI medium according to the CLSI broth microdilution protocol. Growth was quantified as OD<sub>600nm</sub> after 24 hours incubation at 35°C and are presented as percent growth relative to the drug free control. Data from a single experiment representative of two biological replicates is shown.

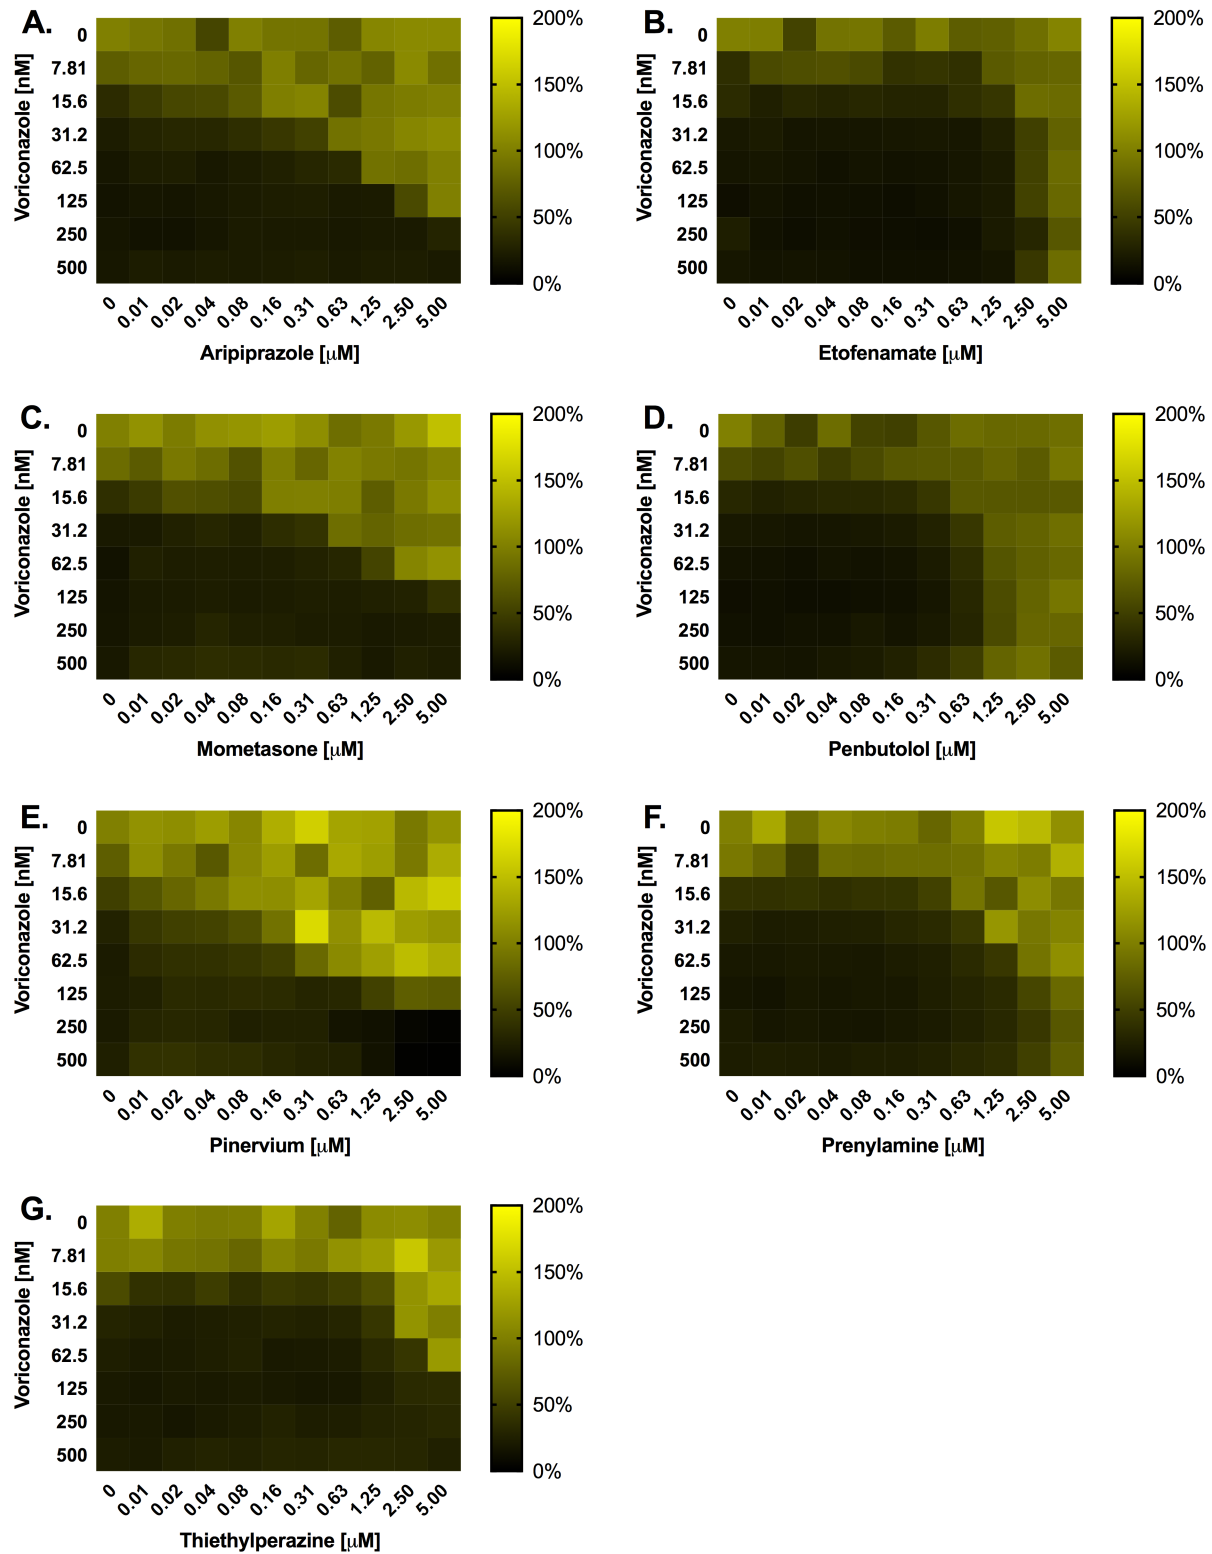

**Supplemental Figure 2. A variety of approved medications substantially diminish *Candida albicans* susceptibility to voriconazole.** *C. albicans* (strain SC5314) susceptibility to voriconazole was tested in the absence (DMSO vehicle alone) or presence of 5 μM of the indicated compounds, in RPMI medium according to the CLSI broth microdilution protocol. Growth was quantified as OD<sub>600nm</sub> after 24 hours incubation at 35°C and are presented as percent growth relative to the drug free control. Data from a single experiment representative of two biological replicates is shown.

1 **Supplemental table 1: Minimum inhibitory concentrations for the selected antifungals**  
 2 **under screening conditions with the selected strains.** The susceptibility of *C. albicans* strain  
 3 SC5314, *C. glabrata* strain ATCC2001, *C. tropicalis* strains MYA-3404 or Ct8, and *C.*  
 4 *parapsilosis* strain CDC317, to the indicated antifungal drugs was determined according to the  
 5 CLSI broth microdilution method.

| Antifungal     | Species                   | MIC          |
|----------------|---------------------------|--------------|
| Fluconazole    | <i>C. albicans</i>        | 0.63 $\mu$ M |
|                | <i>C. parapsilosis</i>    | 6.25 $\mu$ M |
|                | <i>C. tropicalis</i> Ct 8 | 0.39 $\mu$ M |
|                | <i>C. glabrata</i>        | 25 $\mu$ M   |
| Caspofungin    | <i>C. albicans</i>        | 125 nM       |
|                | <i>C. parapsilosis</i>    | 250 nM       |
|                | <i>C. tropicalis</i>      | 250 nM       |
|                | <i>C. glabrata</i>        | 125 nM       |
| Amphotericin B | <i>C. albicans</i>        | 125 nM       |
|                | <i>C. parapsilosis</i>    | 250 nM       |
|                | <i>C. tropicalis</i>      | 125 nM       |
|                | <i>C. glabrata</i>        | 250 nM       |

6  
 7 **Supplemental Table 2: Agents from the Prestwick collection that suppress the antifungal**  
 8 **activity of fluconazole at 1  $\mu$ M in *Candida albicans*.** The Prestwick collection, containing a  
 9 variety of FDA-approved drugs was screened with each compound at a final concentration of 5  
 10  $\mu$ M, to identify those which restore the growth of *C. albicans* strain SC5314 in the presence of 1  
 11  $\mu$ M fluconazole (approximately 2-fold MIC). Hits were defined as compounds that restore fungal  
 12 growth to at least 50% of the untreated control wells.

| Screen                                           | Compound                         | Growth restoration (%) |
|--------------------------------------------------|----------------------------------|------------------------|
| <i>C. albicans</i> ,<br>1 $\mu$ M<br>fluconazole | <b>Untreated</b>                 | <b>100</b>             |
|                                                  | <b>Fluconazole alone</b>         | <b>0</b>               |
|                                                  | Niclosamide                      | 69                     |
|                                                  | Triflupromazine<br>hydrochloride | 111                    |
|                                                  | Chlorpromazine<br>hydrochloride  | 82                     |
|                                                  | Dibucaine                        | 77                     |

|                                 |     |
|---------------------------------|-----|
| Thioridazine hydrochloride      | 83  |
| Perphenazine                    | 71  |
| Terfenadine                     | 112 |
| Tamoxifen citrate               | 68  |
| Nicergoline                     | 56  |
| Asenapine maleate               | 112 |
| Clemizole hydrochloride         | 56  |
| Dyclonine hydrochloride         | 76  |
| Fendiline hydrochloride         | 116 |
| Pimozide                        | 64  |
| Mebeverine hydrochloride        | 99  |
| Trifluoperazine dihydrochloride | 117 |
| Fluphenazine dihydrochloride    | 119 |
| Chlorprothixene hydrochloride   | 110 |
| Metergoline                     | 125 |
| Benfluorex                      | 77  |
| Bepridil hydrochloride          | 92  |
| Benzbromarone                   | 102 |
| Methiothepin maleate            | 119 |
| Nefazodone hydrochloride        | 89  |
| GBR 12909 dihydrochloride       | 147 |
| Clomiphene citrate              | 126 |
| Prochlorperazine dimaleate      | 85  |
| Testosterone propionate         | 83  |
| Amiodarone hydrochloride        | 113 |
| Suloctidil                      | 127 |
| Zotepine                        | 65  |
| Progesterone                    | 66  |
| Daunorubicin hydrochloride      | 67  |
| Metixene hydrochloride          | 126 |
| Propafenone hydrochloride       | 69  |
| Fluoxetine hydrochloride        | 77  |
| Atovaquone                      | 61  |
| Parthenolide                    | 105 |
| Hexetidine                      | 129 |
| DO 897/99                       | 117 |
| Prenylamine lactate             | 123 |
| Mometasone furoate              | 109 |

|                                   |     |
|-----------------------------------|-----|
| Azelastine hydrochloride          | 154 |
| Etofenamate                       | 102 |
| Dimethisoquin hydrochloride       | 163 |
| Sertindole                        | 90  |
| Pinaverium bromide                | 128 |
| Proadifen hydrochloride           | 68  |
| Drofenine hydrochloride           | 105 |
| Cloperastine hydrochloride        | 86  |
| Methotrimeprazine maleat<br>salt  | 68  |
| Auranofin                         | 100 |
| Paroxetine Hydrochloride          | 101 |
| Beclomethasone dipropionate       | 61  |
| Promethazine hydrochloride        | 103 |
| Fluspirilen                       | 105 |
| Toremifene                        | 116 |
| Megestrol acetate                 | 82  |
| Indatraline hydrochloride         | 97  |
| Naftopidil dihydrochloride        | 72  |
| Nandrolone                        | 54  |
| Norgestimate                      | 51  |
| Chlormadinone acetate             | 88  |
| Zuclopenthixol<br>dihydrochloride | 89  |
| Deptropine citrate                | 51  |
| Sertraline                        | 135 |
| Halofantrine hydrochloride        | 141 |
| Nomegestrol acetate               | 109 |
| Naftifine hydrochloride           | 97  |
| Thiethylperazine dimalate         | 106 |
| Cyproterone acetate               | 121 |
| Toltrazuril                       | 111 |
| Parbendazole                      | 80  |
| Melengestrol acetate              | 80  |
| Carvedilol                        | 80  |
| Aripiprazole                      | 128 |
| Ethinylestradiol                  | 65  |
| Aripiprazole                      | 118 |
| Ethinylestradiol                  | 63  |
| (R)-Duloxetine hydrochloride      | 93  |
| 1,8-Dihydroxyanthraquinone        | 54  |

|                          |     |
|--------------------------|-----|
| Nitazoxanide             | 85  |
| Lofepamine               | 71  |
| Epirubicin hydrochloride | 92  |
| Lomerizine hydrochloride | 103 |
| Oxymetholone             | 87  |
| Triclabendazole          | 94  |

13  
14 **Supplemental Table 3: Agents from the Prestwick collection that suppress the antifungal**  
15 **activity of fluconazole at 25  $\mu$ M in *Candida parapsilosis*.** The Prestwick collection, containing  
16 a variety of FDA-approved drugs was screened with each compound at a final concentration of 5  
17  $\mu$ M, to identify those which restore the growth of a *C. parapsilosis* clinical isolate in the  
18 presence of 25  $\mu$ M fluconazole (approximately 4-fold MIC). Hits were defined as compounds  
19 that restore fungal growth to at least 50% of the untreated control wells.

| Screen                                             | Compound                          | Growth restoration (%) |
|----------------------------------------------------|-----------------------------------|------------------------|
| <i>C. parapsilosis</i> ,<br>25 $\mu$ M fluconazole | <b>Untreated</b>                  | <b>100</b>             |
|                                                    | <b>Fluconazole alone</b>          | <b>0</b>               |
|                                                    | Triflupromazine hydrochloride     | 58                     |
|                                                    | Chlorpromazine hydrochloride      | 56                     |
|                                                    | Thioridazine hydrochloride        | 61                     |
|                                                    | Disulfiram                        | 53                     |
|                                                    | Cyproheptadine hydrochloride      | 54                     |
|                                                    | Perphenazine                      | 61                     |
|                                                    | Perhexiline maleate               | 55                     |
|                                                    | Mebeverine hydrochloride          | 55                     |
|                                                    | Trifluoroperazine dihydrochloride | 66                     |
|                                                    | Fluphenazine dihydrochloride      | 70                     |
|                                                    | Maprotiline hydrochloride         | 56                     |
|                                                    | Chlorprothixene hydrochloride     | 64                     |
|                                                    | Metergoline                       | 57                     |
|                                                    | Methiothepin maleate              | 63                     |
|                                                    | Clomiphene citrate                | 66                     |
|                                                    | Prochlorperazine dimaleate        | 65                     |
|                                                    | Amiodarone hydrochloride          | 52                     |
|                                                    | Zotepine                          | 61                     |
| Hexetidine                                         | 59                                |                        |
| Dimethisoquin hydrochloride                        | 66                                |                        |
| Sertindole                                         | 52                                |                        |
| Pinaverium bromide                                 | 51                                |                        |

|  |                                |    |
|--|--------------------------------|----|
|  | Proadifen hydrochloride        | 52 |
|  | Zuclopenthixol dihydrochloride | 60 |
|  | Deptropine citrate             | 53 |
|  | Halofantrine hydrochloride     | 58 |
|  | Penbutolol sulfate             | 57 |
|  | Thiethylperazine dimalate      | 54 |
|  | Nelfinavir mesylate            | 53 |

20  
21 **Supplemental Table 4: Agents from the Prestwick collection that suppress the antifungal**  
22 **activity of fluconazole at 1.6  $\mu$ M in *Candida tropicalis*.** The Prestwick collection, containing a  
23 variety of FDA-approved drugs was screened with each compound at a final concentration of 5  
24  $\mu$ M, to identify those which restore the growth of *C. tropicalis* strain Ct8 in the presence of 1.6  
25  $\mu$ M fluconazole (approximately 4-fold MIC). Hits were defined as compounds that restore fungal  
26 growth to at least 50% of the untreated control wells.

| Screen                                             | Compound                      | Growth restoration (%) |
|----------------------------------------------------|-------------------------------|------------------------|
| <i>C. tropicalis</i><br>1.6 $\mu$ M<br>fluconazole | <b>Untreated</b>              | <b>100</b>             |
|                                                    | <b>Fluconazole alone</b>      | <b>0</b>               |
|                                                    | Pyrimethamine                 | 98                     |
|                                                    | Triflupromazine hydrochloride | 95                     |
|                                                    | Chlorpromazine hydrochloride  | 85                     |
|                                                    | Imipramine hydrochloride      | 50                     |
|                                                    | Amitriptyline hydrochloride   | 65                     |
|                                                    | Thioridazine hydrochloride    | 100                    |
|                                                    | Cyproheptadine hydrochloride  | 75                     |
|                                                    | Perphenazine                  | 88                     |
|                                                    | Hydroxyzine dihydrochloride   | 59                     |
|                                                    | Astemizole                    | 61                     |
|                                                    | Tamoxifen citrate             | 80                     |
|                                                    | Nicergoline                   | 60                     |
|                                                    | Alverine citrate              | 87                     |
|                                                    | Asenapine maleate             | 51                     |
|                                                    | Fenbendazole                  | 54                     |
|                                                    | Carmofur                      | 74                     |
|                                                    | Albendazole                   | 67                     |
|                                                    | Vinpocetine                   | 100                    |
| Clomipramine hydrochloride                         | 94                            |                        |
| Fendiline hydrochloride                            | 72                            |                        |
| Cinnarizine                                        | 85                            |                        |

|                                     |     |
|-------------------------------------|-----|
| Homochlorocyclizine dihydrochloride | 97  |
| Perhexiline maleate                 | 86  |
| Oxybutynin chloride                 | 118 |
| Pimethixene maleate                 | 81  |
| Benzydamine hydrochloride           | 60  |
| Clemastine fumarate                 | 109 |
| Pimozide                            | 100 |
| Flunarizine dihydrochloride         | 97  |
| Trifluoperazine dihydrochloride     | 85  |
| Fluphenazine dihydrochloride        | 89  |
| Chlorprothixene hydrochloride       | 105 |
| Benfluorex                          | 107 |
| Bepidil hydrochloride               | 104 |
| Benzbromarone                       | 83  |
| Methiothepin maleate                | 72  |
| Clofazimine                         | 71  |
| Nefazodone hydrochloride            | 98  |
| Lidoflazine                         | 92  |
| GBR 12909 dihydrochloride           | 107 |
| Carbetapentane citrate              | 88  |
| Clomiphene citrate                  | 76  |
| Prochlorperazine dimaleate          | 125 |
| Amiodarone hydrochloride            | 84  |
| Zotepine                            | 77  |
| Quinidine hydrochloride monohydrate | 59  |
| Cyclobenzapine hydrochloride        | 77  |
| Meclozine dihydrochloride           | 57  |
| Efavirenz                           | 101 |
| Danuorubicin hydrochloride          | 87  |
| Dosulepin hydrochloride             | 69  |
| Metixene hydrochloride              | 95  |
| Propafenone hydrochloride           | 79  |
| Fluoxetine hydrochloride            | 65  |
| Hexetidine                          | 99  |
| DO 897/99                           | 90  |
| Prenylamine lactate                 | 93  |
| Mometasone furoate                  | 54  |
| Dimethisoquin hydrochloride         | 101 |
| Pinaverium bromide                  | 74  |



|                                |     |
|--------------------------------|-----|
| Promazine hydrochloride        | 75  |
| Chlorcyclizine hydrochloride   | 95  |
| Diphenylprialine hydrochloride | 69  |
| Proadifen hydrochloride        | 99  |
| Drofenine hydrochloride        | 98  |
| Cloperastine hydrochloride     | 100 |
| Methotrimeprazine maleate      | 87  |
| Trimipramine maleate           | 85  |
| Ethopropazine hydrochloride    | 67  |
| Trimeprazine tartrate          | 85  |
| Procyclidine hydrochloride     | 56  |
| Promethazine hydrochloride     | 67  |
| Fluspirilene                   | 105 |
| S(-)Eticlopride hydrochloride  | 82  |
| Toremifene                     | 94  |
| Canrenone                      | 82  |
| Indtraline hydrochloride       | 104 |
| Naftopidil dihydrochloride     |     |
| Pizotifen malate               | 104 |
| Zuclopenthixol dihydrochloride | 99  |
| Alfaxalone                     | 87  |
| Deptropine citrate             | 97  |
| Sertraline                     | 67  |
| Halofantrine hydrochloride     | 111 |
| Penbutolol sulfate             | 69  |
| Piperacetazine                 | 60  |
| Thiethylperazine dimalate      | 81  |
| Methiazole                     | 79  |
| Toltrazuril                    | 85  |
| Triclosan                      | 71  |
| Aripiprazole                   | 106 |
| Benztropine mesylate           | 93  |
| Ipriflavone                    | 54  |
| Estramustine                   | 57  |
| 1,8-Dihydroxyanthraquinone     | 87  |
| Epirubicin hydrochloride       | 83  |
| Lomerizine hydrochloride       | 75  |

27  
28  
29

30 **Supplemental table 5: Strains used in this study.**

| Strain     | Genotype                                                                | Source             |
|------------|-------------------------------------------------------------------------|--------------------|
| SC5314     | <i>C. albicans</i> reference strain                                     | (1)                |
| CA1L-1     | <i>C. albicans his1Δ/Δ arg4Δ/Δ cdr1Δ::HIS1/cdr1Δ::ARG4 ura3Δ/Δ:URA3</i> | (2)                |
| MA3L-1     | <i>C. albicans his1Δ/Δ arg4Δ/Δ mdr1Δ::HIS1/mdr1Δ::ARG4 ura3Δ/Δ:URA3</i> | (2)                |
| ScMRR1M4A  | <i>C. albicans mrr1Δ::FRT/mrr1Δ::FRT</i>                                | (3)                |
| SZY33      | <i>C. albicans tac1Δ::FRT/tac1Δ::FRT TAC1</i>                           | (4)                |
| UPC2M4A    | <i>C. albicans upc2-1Δ::FRT/upc2-2Δ::FRT</i>                            | (5)                |
| UPC2R14A   | <i>C. albicans UPC2<sup>G648D</sup>-FRT/UPC2<sup>G648D</sup>-FRT</i>    | (6)                |
| ScMRR1M4A  | <i>C. albicans mrr1Δ::FRT/mrr1Δ::FRT</i>                                | (7)                |
| ScTAC1R34A | <i>C. albicans TAC1<sup>G980E</sup>-FRT/TAC1<sup>G980E</sup>-FRT</i>    | (8)                |
| ATTC2001   | <i>C. glabrata</i> reference strain                                     | (9)                |
| SM1        | <i>C. glabrata</i> clinical isolate                                     | (10)               |
| SM1Δpdr1   | <i>C. glabrata pdr1::FRT</i>                                            | (11)               |
| CDC 317    | <i>C. parapsilosis</i> reference strain                                 | (12)               |
| MYA-3404   | <i>C. tropicalis</i> reference strain                                   | (13)               |
| Ct 8       | <i>C. tropicalis</i> clinical isolate 8                                 | University of Iowa |

31

32

33

**Supplemental table 6: Oligonucleotides used in this study.**

| Primer        | Sequence                            |
|---------------|-------------------------------------|
| ACT1- forward | ACG GTG AAG AAG TTG CTG CTT TAG TT  |
| ACT1- reverse | CGT CGT CAC CGG CAA AA              |
| CDR1- forward | ATT CTA AGA TGT CGT CGC AAG ATG     |
| CDR1- reverse | AGT TCT GGC TAA ATT CTG AAT GTT TTC |
| CDR2- forward | TAG TCC ATT CAA CGG CAA CAT T       |
| CDR2- reverse | CAC CCA GTA TTT GGC ATT GAA A       |
| MDR1- forward | ACA TAA ATA CTT TGC CCA TCC AGA A   |
| MDR1- reverse | AAG AGT TGG TTT GTA ATC GGC TAA A   |

34

35

**References.**

- 36 1. Odds FC, Brown AJ, Gow NA. 2004. *Candida albicans* genome sequence: a platform for  
37 genomics in the absence of genetics. *Genome Biol* 5:230.
- 38 2. Luna-Tapia A, Kerns ME, Eberle KE, Jursic BS, Palmer GE. 2015. Trafficking through the  
39 late endosome significantly impacts *Candida albicans* tolerance of the azole antifungals.  
40 *Antimicrob Agents Chemother* 59:2410-20.
- 41 3. Morschhauser J, Barker KS, Liu TT, Bla BWJ, Homayouni R, Rogers PD. 2007. The  
42 transcription factor Mrr1p controls expression of the MDR1 efflux pump and mediates  
43 multidrug resistance in *Candida albicans*. *PLoS Pathog* 3:e164.
- 44 4. Znaidi S, De Deken X, Weber S, Rigby T, Nantel A, Raymond M. 2007. The zinc cluster  
45 transcription factor Tac1p regulates PDR16 expression in *Candida albicans*. *Mol*  
46 *Microbiol* 66:440-52.
- 47 5. Dunkel N, Liu TT, Barker KS, Homayouni R, Morschhauser J, Rogers PD. 2008. A gain-of-  
48 function mutation in the transcription factor Upc2p causes upregulation of ergosterol  
49 biosynthesis genes and increased fluconazole resistance in a clinical *Candida albicans*  
50 isolate. *Eukaryot Cell* 7:1180-90.
- 51 6. Heilmann CJ, Schneider S, Barker KS, Rogers PD, Morschhauser J. 2010. An A643T  
52 mutation in the transcription factor Upc2p causes constitutive ERG11 upregulation and

53 increased fluconazole resistance in *Candida albicans*. *Antimicrob Agents Chemother*  
54 54:353-9.

55 7. Schubert S, Barker KS, Znaidi S, Schneider S, Dierolf F, Dunkel N, Aid M, Boucher G,  
56 Rogers PD, Raymond M, Morschhauser J. 2011. Regulation of efflux pump expression  
57 and drug resistance by the transcription factors Mrr1, Upc2, and Cap1 in *Candida*  
58 *albicans*. *Antimicrob Agents Chemother* 55:2212-23.

59 8. Sasse C, Schillig R, Dierolf F, Weyler M, Schneider S, Mogavero S, Rogers PD,  
60 Morschhauser J. 2011. The transcription factor Ndt80 does not contribute to Mrr1-,  
61 Tac1-, and Upc2-mediated fluconazole resistance in *Candida albicans*. *PLoS One*  
62 6:e25623.

63 9. Koszul R, Malpertuy A, Frangeul L, Bouchier C, Wincker P, Thierry A, Duthoy S, Ferris S,  
64 Hennequin C, Dujon B. 2003. The complete mitochondrial genome sequence of the  
65 pathogenic yeast *Candida (Torulopsis) glabrata*. *FEBS Lett* 534:39-48.

66 10. Lee MW, Kim BJ, Choi HK, Ryu MJ, Kim SB, Kang KM, Cho EJ, Youn HD, Huh WK, Kim ST.  
67 2007. Global protein expression profiling of budding yeast in response to DNA damage.  
68 *Yeast* 24:145-54.

69 11. Caudle KE, Barker KS, Wiederhold NP, Xu L, Homayouni R, Rogers PD. 2011.  
70 Genomewide expression profile analysis of the *Candida glabrata* Pdr1 regulon. *Eukaryot*  
71 *Cell* 10:373-83.

72 12. Kuhn DM, Mikherjee PK, Clark TA, Pujol C, Chandra J, Hajjeh RA, Warnock DW, Soil DR,  
73 Ghannoum MA. 2004. *Candida parapsilosis* characterization in an outbreak setting.  
74 *Emerg Infect Dis* 10:1074-81.

75 13. Joly S, Pujol C, Schroppel K, Soll DR. 1996. Development of two species-specific  
76 fingerprinting probes for broad computer-assisted epidemiological studies of *Candida*  
77 *tropicalis*. *J Clin Microbiol* 34:3063-71.

78  
79
